# Supplementary material
Source: PubMed Central journal article supplement (PMC6571149)
Supplement: NIHMS890859-supplement-1.pdf [file NIHMS890859-supplement-1.pdf]

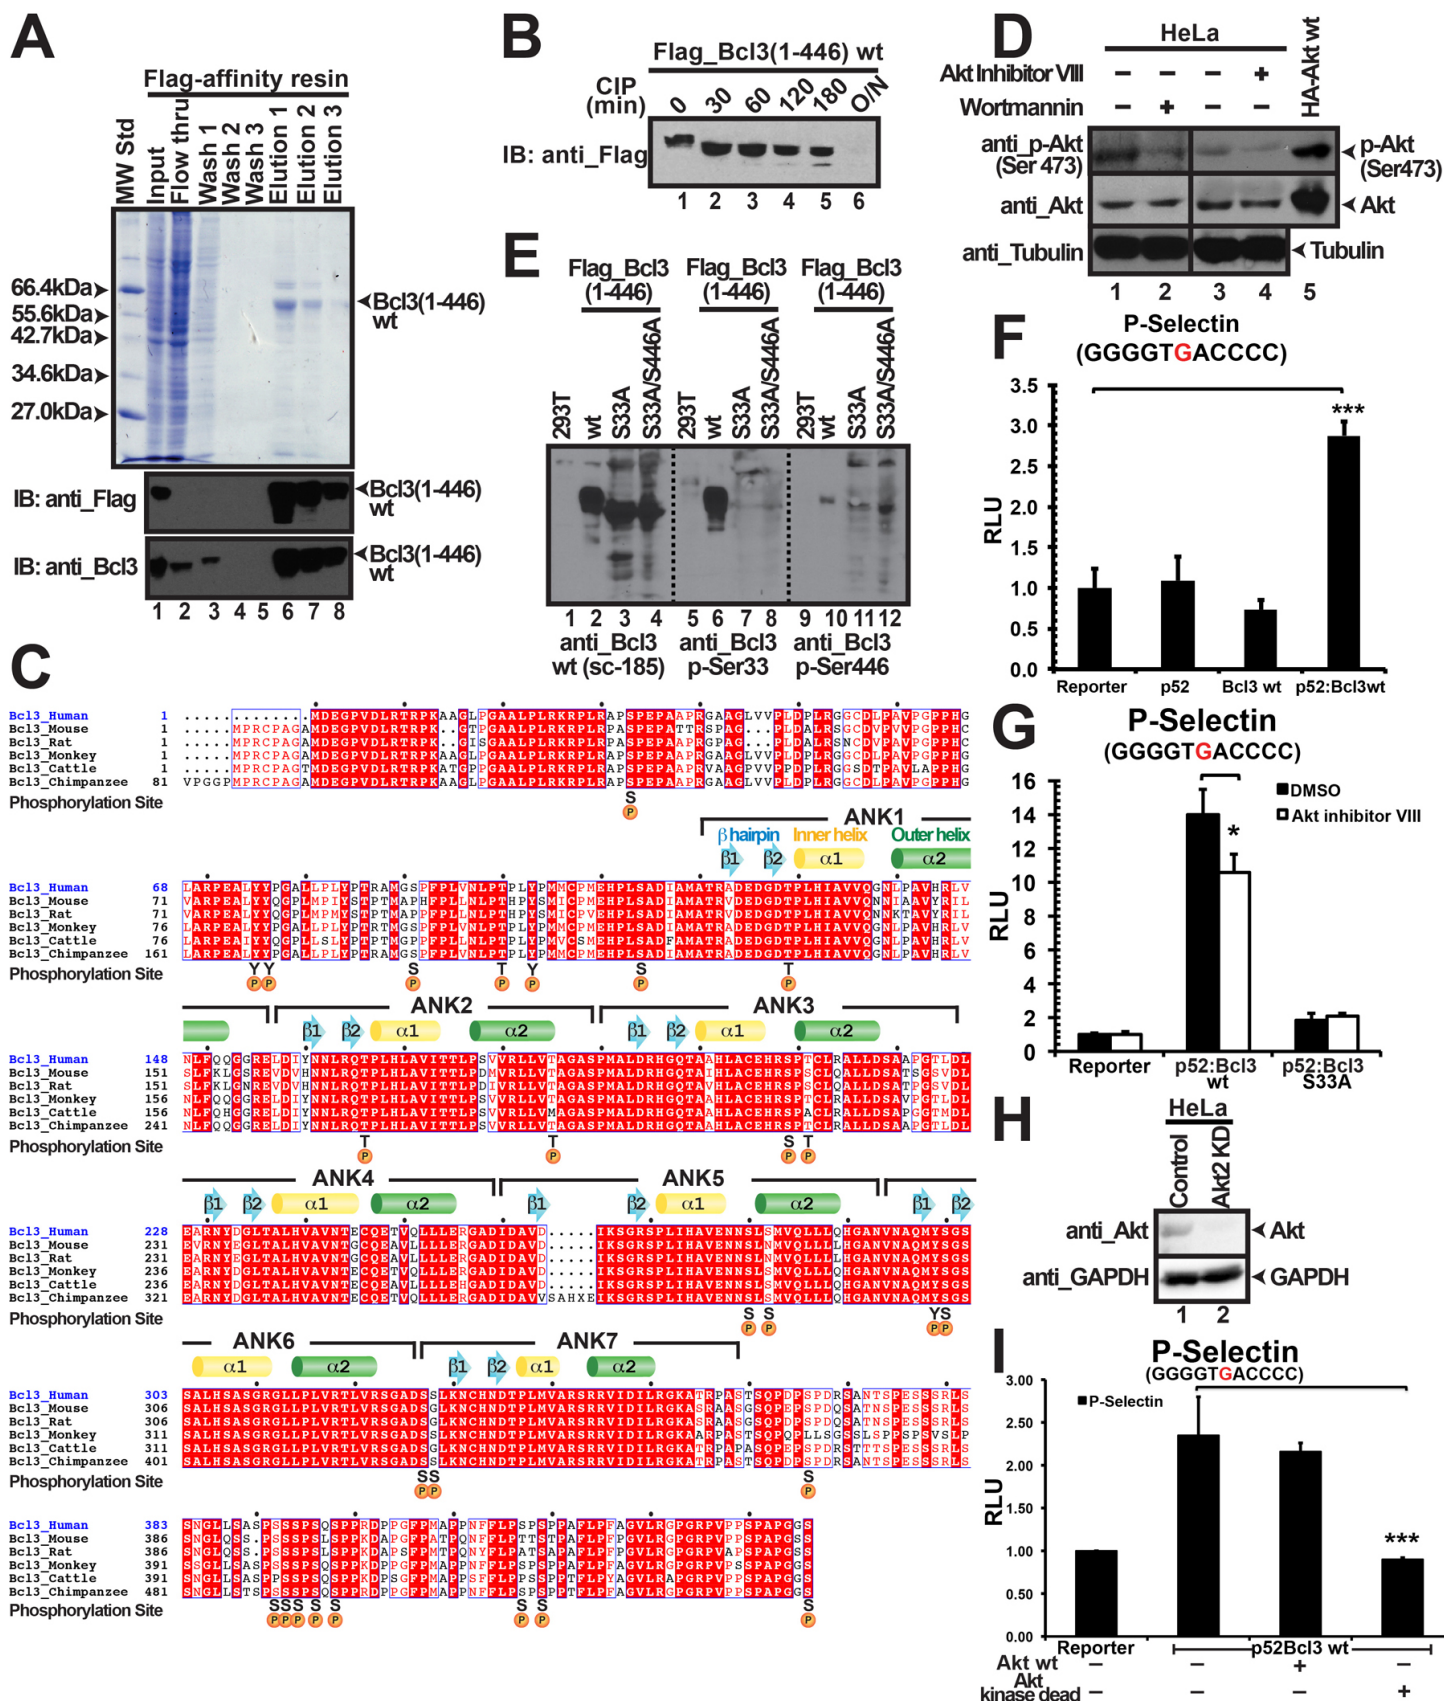

### **Figure S1. Bcl3 is a phosphorylated protein and targeted by Akt. Related to Figure 1**

(A) Full-length Flag-tagged Bcl3(1-446) was expressed and purified from HEK 293T cells using Flag affinity chromatography. 12.5% SDS-PAGE analysis of eluates from the Flag affinity resin. Coomassie staining showing purity of Flag-Bcl3 (Top) and Western blots (WB) using both Flag and Bcl3 antibodies showing identity of the protein. (B) CIP dephosphorylation of Flag-Bcl3(1-446). 3  $\mu$ g of purified Flag-tagged Bcl3 was treated with CIP at room temperature for indicated times followed by anti-Flag WB analysis. (C) Sequence alignment of Bcl3. 27 newly identified phosphorylation sites are indicated below the sequences; the secondary-structural elements of ARD are shown above the sequences; black dots above the sequences indicate every tenth residue in the sequence of human Bcl3. (D) Both wortmannin and Akt Inhibitor VIII inhibited Akt kinase activation in HeLa cells as marked by reduction of activation loop residue Ser473 phosphorylation. HeLa cells were left untreated (lane 1 and 3) or treated with 0.5  $\mu$ M wortmannin (lane 2) or 5  $\mu$ M Akt Inhibitor VIII (lane 4) for 48 hours. Cell extracts were subjected to anti-p-Akt(Ser473) and anti-Akt WB analysis. HA-tagged wt Akt was transiently transfected into HeLa cells used as a control for Akt expression and constitutive activation (lane 5). (E) WB showing the specificity of the phosphor-Bcl3 antibodies. p-Ser33 antibody only recognized wt Bcl3 expressed in HEK 293T cells, but not S33A or S33A/S446A mutant. (F) p52 or Bcl3 alone failed to activate luciferase reporter driven by the P-Selectin promoter. Co-expression of p52 and Bcl3 however activated the reporter. (G) Akt inhibitor VIII decreased wt Bcl3's transcriptional activity on P-Selectin reporter; however, it has no effect on S33A mutant. (H) Efficiency of shRNA mediated Akt2 knock down (KD) in HeLa cells. (I) Overexpressed kinase dead Akt, but not wt Akt, abolished Bcl3's transcriptional activity from the P-Selectin luciferase reporter. All luciferase reporter data were analyzed from three independent experiments performed in triplicate. \* $p < 0.05$ , \*\*\* $p < 0.005$ . Error bar represent SD.

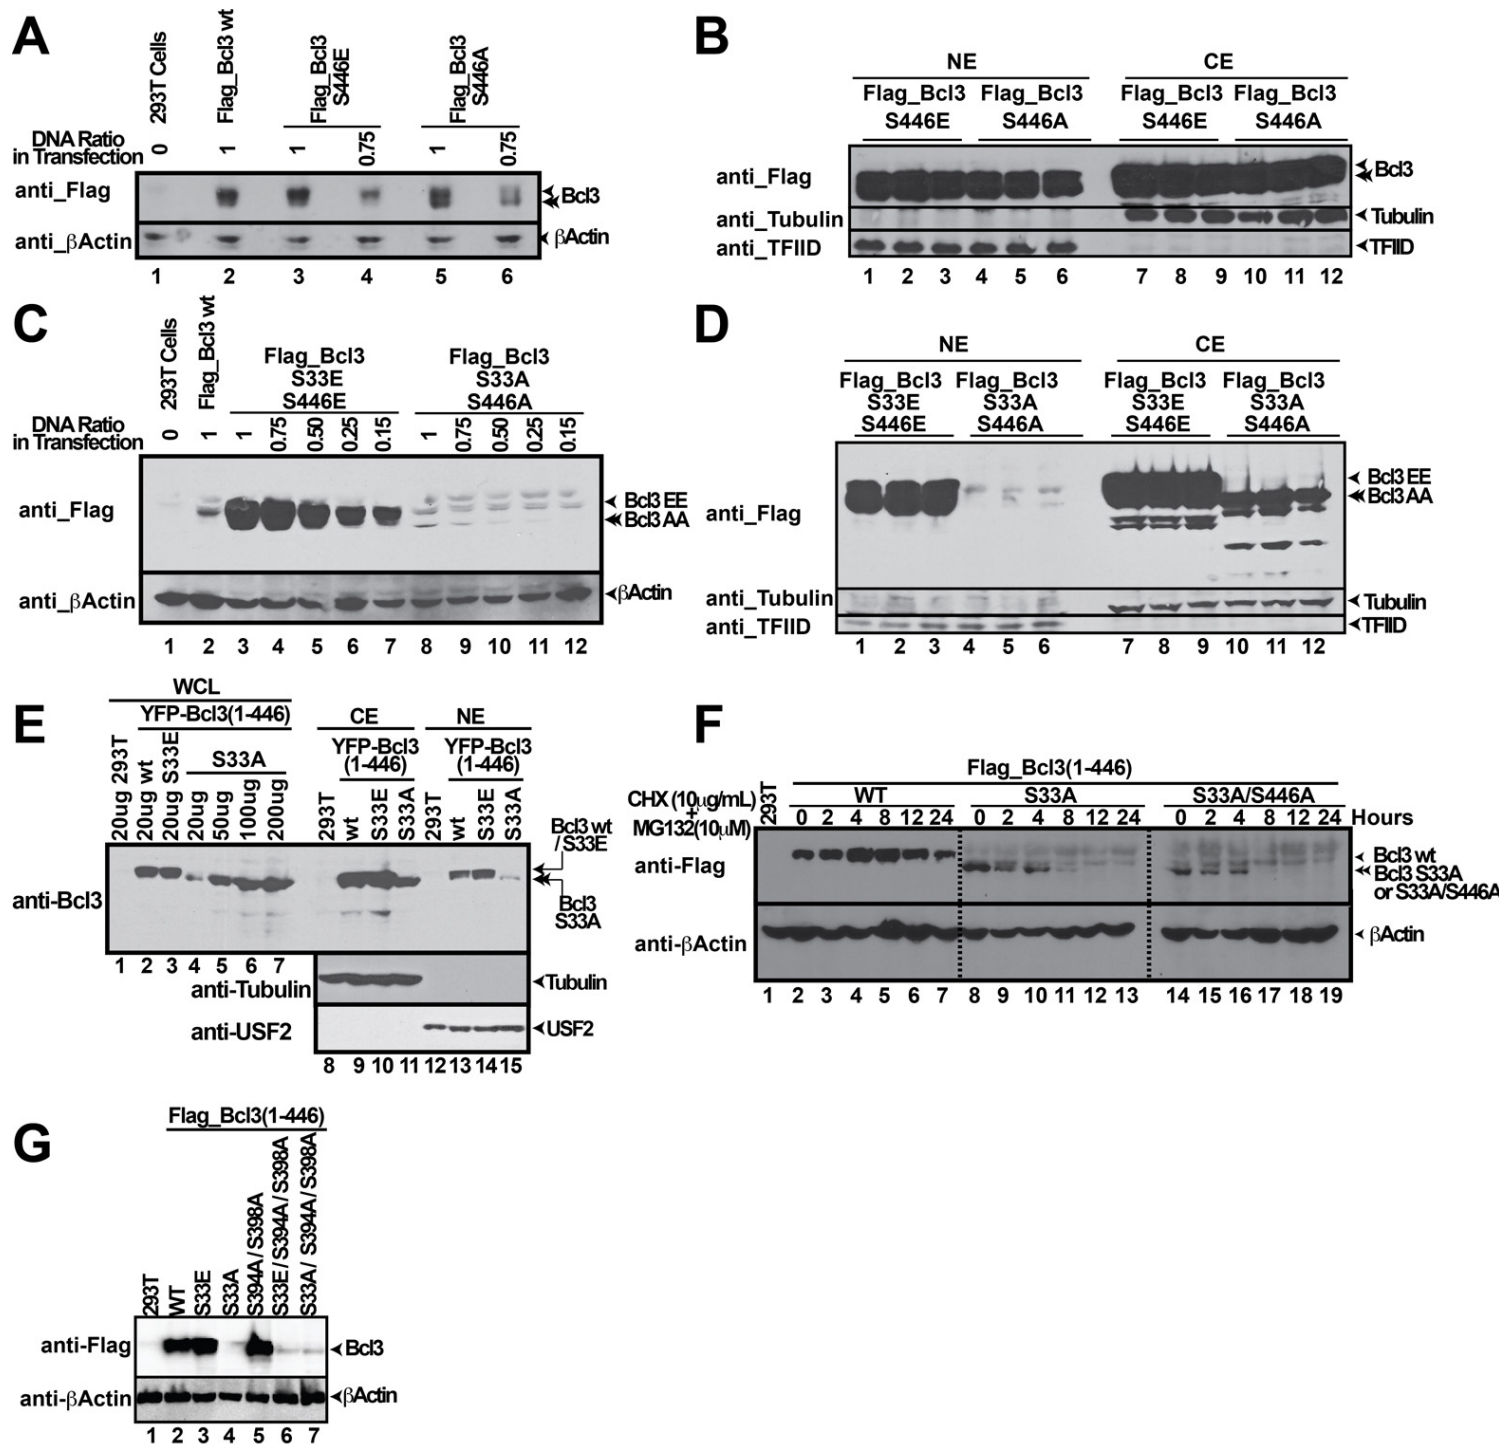

**Figure S2. Protein Expressions, Cellular Localizations and Stabilities of Bcl3 Mutants. Related to Figure 2**

WB monitoring total (A) and sub-compartment (B) expression wt Bcl3 wt, S446E and S446A. (C) Comparison of expression levels of wt Bcl3, S33E/S446E (EE) and S33A/S446A (AA) mutant. Different amounts of DNA were used for the transfection in HEK 293T cells in order to monitor the expression levels. (D) Nuclear and cytoplasmic expressions of Bcl3 EE and AA mutants. (E) YFP-tagged Bcl3 expression and cellular localization. (F) Flag-tagged Bcl3 wt, S33A, and AA mutants were transiently transfected into HEK 293T cells followed by CHX and MG132 treatments for indicated times. S33A and AA mutants were partially stabilized by MG132 treatment. (G) Mutations of GSK3 $\beta$  mediated phosphorylation, S394A and S398A, did not stabilize Bcl3 when expressed along with S33 mutations.

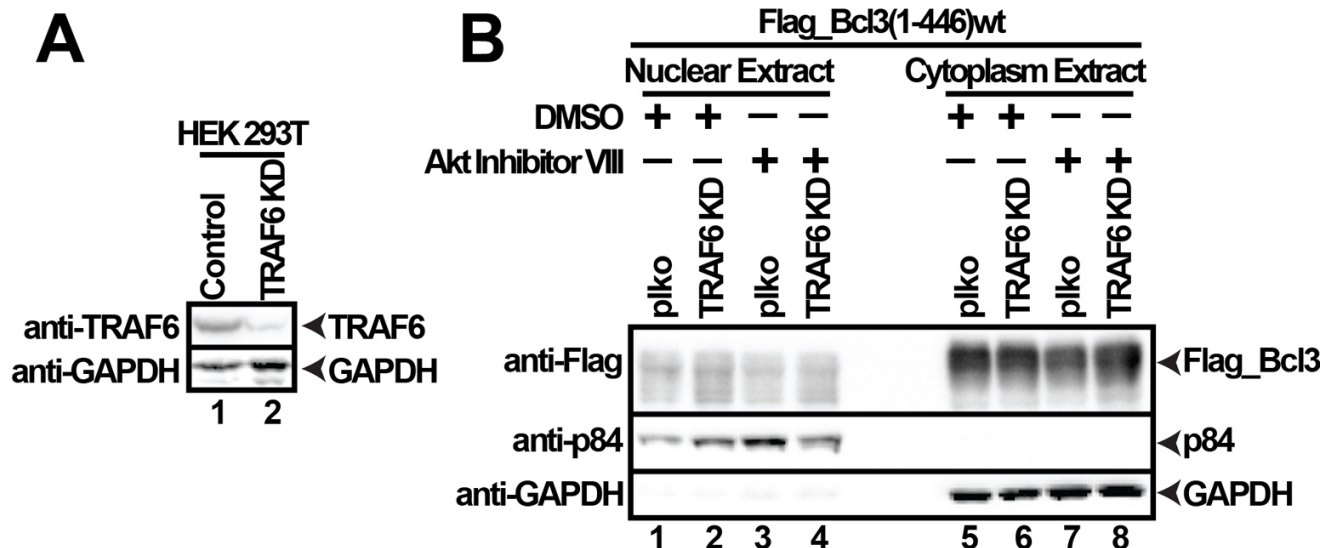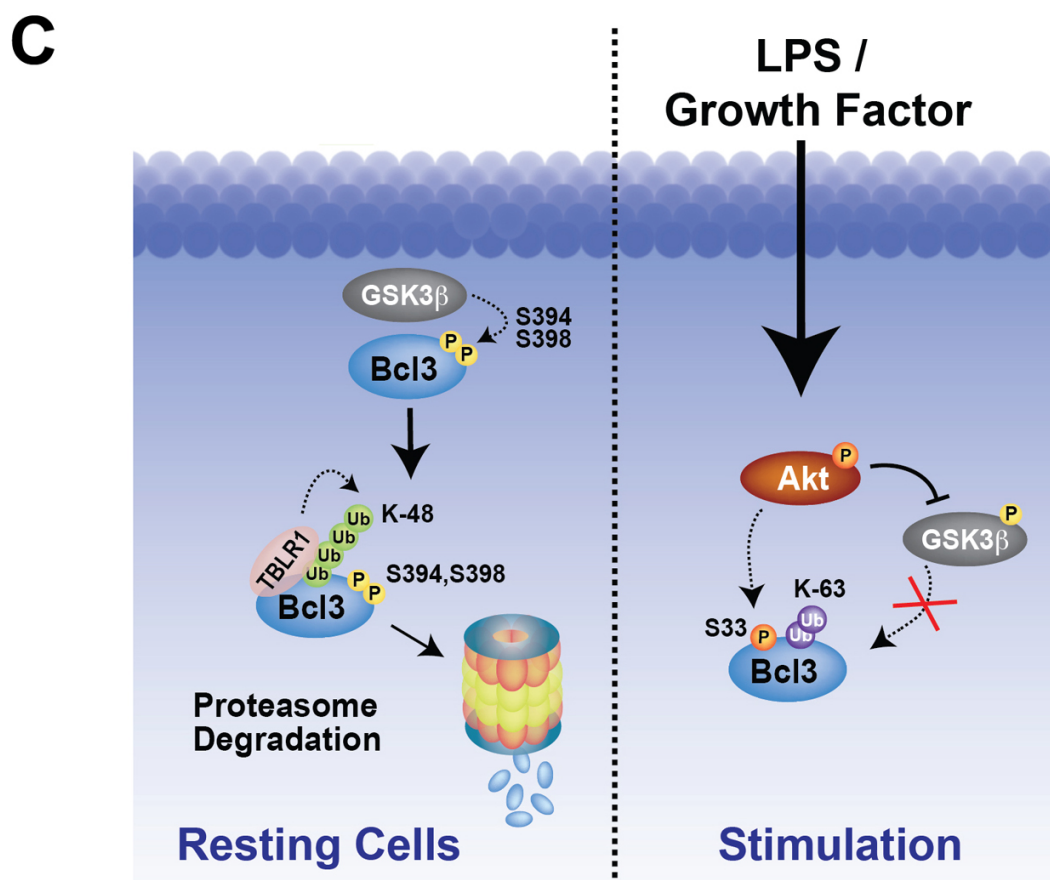

**Figure S3. Model of Bcl3 Stabilization in Stimulating Cells. Related to Figure 1, 2 and 3**

(A) Efficiency of TRAF6 KD in HEK 293T cells monitored by WB using TRAF6 specific antibody. (B) In TRAF6 KD HEK 293T cells, nuclear localization of transiently expressed Flag\_Bcl3 was not affected upon Akt Inhibitor VIII treatment. (C) In resting cells, Bcl3 is phosphorylated at Ser394 and Ser398 by GSK3 $\beta$  and this leads to its basal degradation. Upon stimulation, Akt gets activated which will in turn stabilize Bcl3 by directly phosphorylate Bcl3 at Ser33; and also phosphorylate GSK3 $\beta$  resulting in the deactivation of GSK3 $\beta$ .

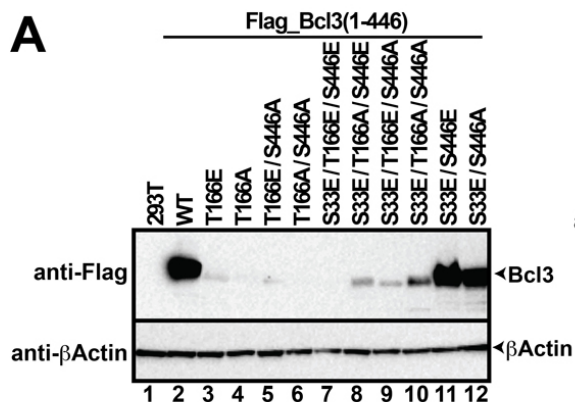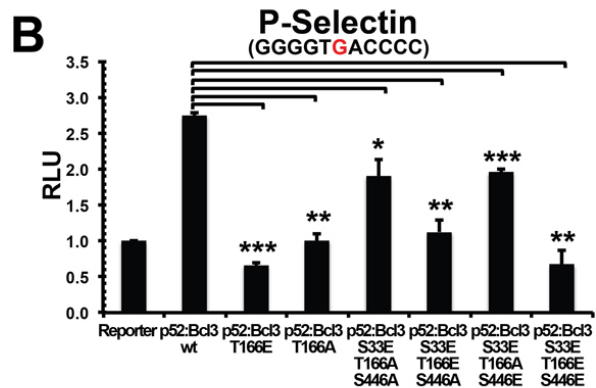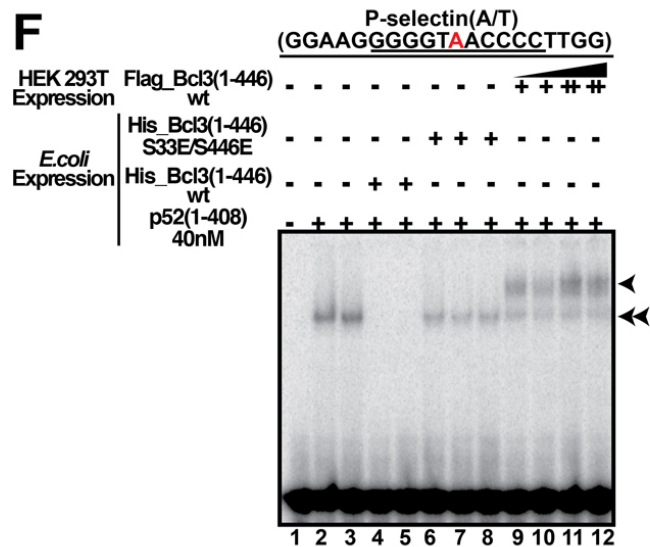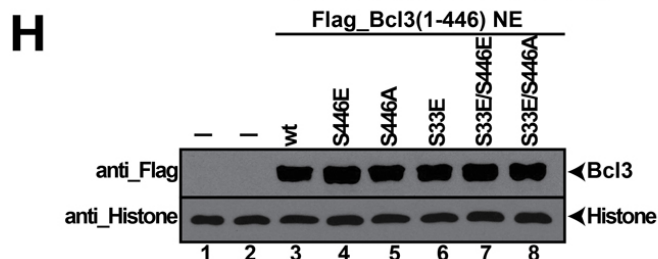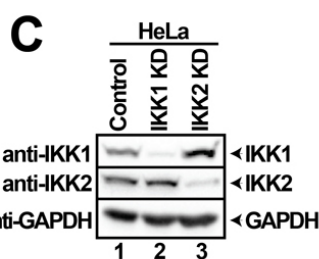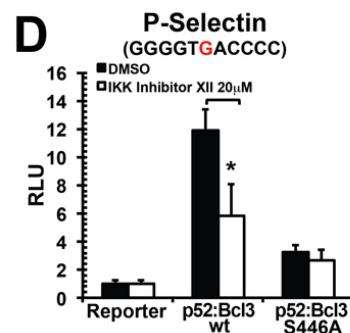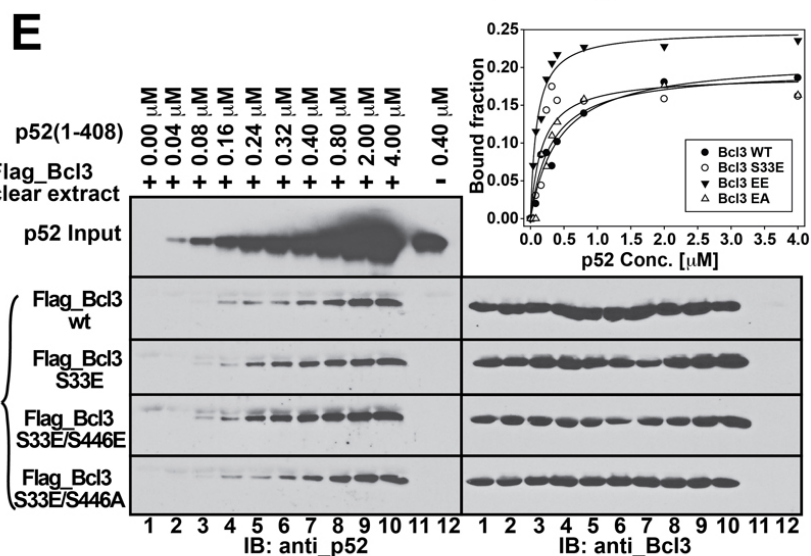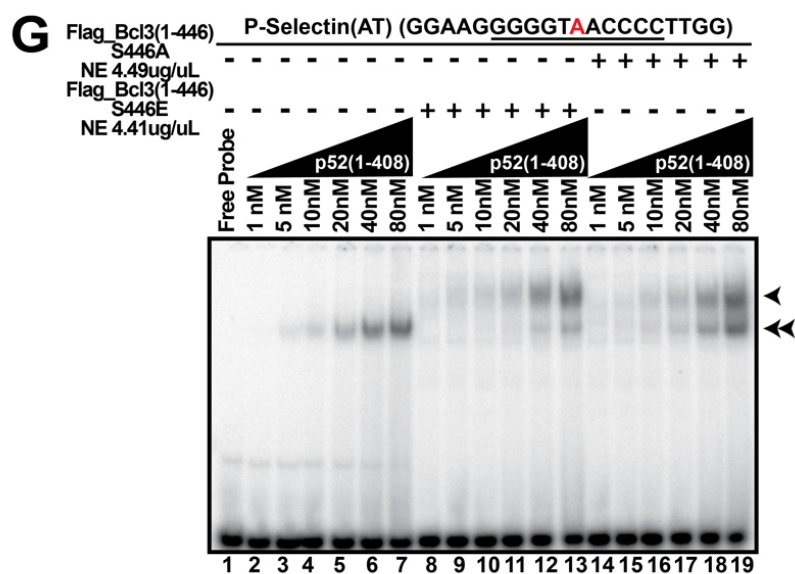

#### **Figure S4. Analysis of Bcl3 Phosphorylation Sites by IKK. Related to Figure 4**

(A) Expression of Flag-tagged full-length wt Bcl3 and Thr166 mutants in HEK 293T cells. (B) Both T166A and T166G mutations were all defective in luciferase reporter activation. (C) WB showing efficiency of IKK1 and IKK2 KD in HeLa cells using IKK1- and IKK2-specific antibodies. KD of one kinase did not affect the expression of the other kinase. (D) IKK inhibitor XII decreased wt Bcl3's transcriptional activity on P-Selectin reporter; however, it has no effect on S446A mutant. The data was analyzed from three independent experiments performed in triplicate. \* $p < 0.05$ , \*\* $p < 0.01$ , \*\*\* $p < 0.005$ . Error bars represent SD. (E) Flag-IP demonstrating binding of recombinant p52 (1-408) to different forms of Flag-Bcl3 isolated from the nuclear extracts. Bound p52 (detected by WB using anti-p52 antibody) was plotted against total p52 input at various concentrations. These results show that Bcl3 EE bound to p52 homodimer better than the other Bcl3 proteins. (F) Bacterial expressed wt Bcl3 removed p52 homodimer from  $\kappa$ B DNA (lane 4-5). Bacterial expressed Bcl3 S33E/S446E (EE) mutant failed to form ternary complex with recombinant p52 protein and  $\kappa$ B DNA in EMSA (lane 6-8); however, the HEK 293T-derived wt Bcl3 formed the stable Bcl3:p52:DNA ternary complex (lane 9-12). (G) EMSA showing HEK 293T-derived Bcl3 S446E formed ternary complexes with recombinant p52 on  $\kappa$ B DNA more efficiently than S446A. Flag-tagged full-length Bcl3 nuclear extracts, recombinant p52 and His-tagged full-length Bcl3 protein and [ $\gamma$ - $^{32}$ P]-ATP labeled P-Selectin  $\kappa$ B DNA was used in the assay. In all EMSAs, single arrow head indicates Bcl3:p52(or p50):DNA ternary complex; double arrow head indicates p52(or p50):DNA binary complex. (H) WB showing similar levels of wt Bcl3 and mutants in the nucleus.

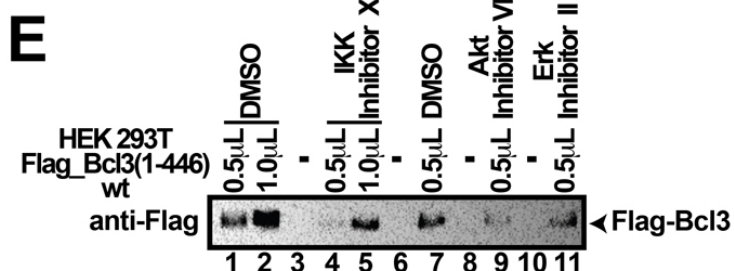

**Figure S5. Erk2 Phosphorylates Bcl3 and Converts it from an NF- $\kappa$ B Inhibitor to a Transcription Coactivator. Related to Figure 5**

(A) Bcl3 S114E mutant enhanced transcriptional activity indicated by luciferase reporter assay. The data was analyzed from three independent experiments performed in triplicate. \* $p < 0.05$ , \*\* $p < 0.01$ . Error bars represent SD. (B) Bacterial expressed Bcl3 S33E/S114E/S446E (EEE) triple mutant, but not wt Bcl3, formed ternary complex with recombinant p50 protein and  $\kappa$ B DNA as shown by EMSA. (C) WB showing efficiency of Erk2 KD in HeLa cells. (D) Bcl3 isolated from Erk inhibitor II treated HEK 293T cells failed abolish Bcl3's ability to form ternary complex formation. In comparison, Bcl3 derived from DMSO treated cells also formed the ternary complex served as a control. In all EMSA, single arrow head indicates Bcl3:p52(or p50):DNA ternary complex; double arrow head indicates p52(or p50):DNA binary complex; (\*) indicates the super-shifted band of the ternary complex in the presence of specific antibody. (E) Flag-Bcl3 expression level in different inhibitor treated HEK 293T cells used in EMSAs.

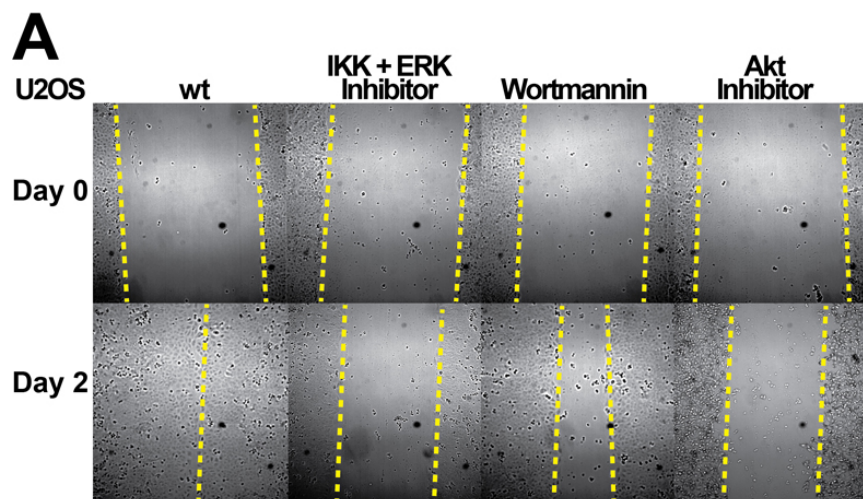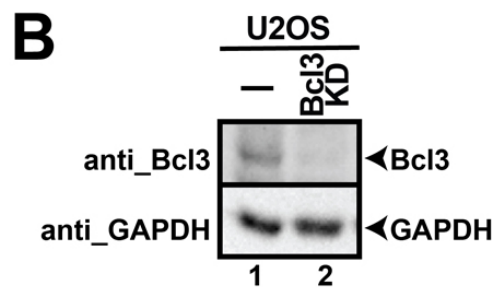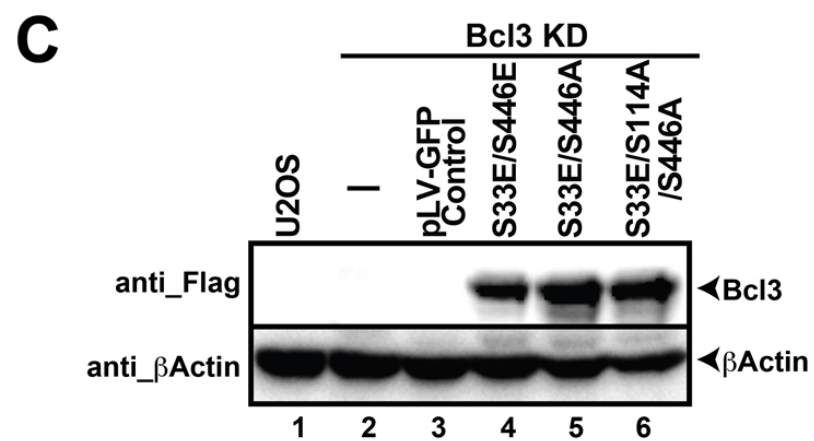

**Figure S6. Bcl3 Phosphorylation is Required for its Cellular Functions. Related to Figure 6**

(A) U2OS cells showed migration defects when treated with Akt, IKK and Erk inhibitors. The yellow dotted lines indicate the edge of the scratch showing the width of scratches. (B) WB using anti-Bcl3 antibody showing reduced level of endogenous Bcl3 in U2OS cells upon CRISPR-Cas9 KD. (C) Different mutants were expressed to a similar level in Bcl3 KD U2OS cells.

**Table S1. Bcl3 phosphorylation residues identified in mass spectrometric analyses. Related to Figure 1, 2, 4, 5 and 6**

| Flag_Bcl3 (HEK 293T) |                  | Flag_Bcl3+IKK Inhibitor (HEK 293T) |                  | IKK1 <i>In Vitro</i> Kinase Assay |                  | ERK2 <i>In Vitro</i> Kinase Assay    |                              |
|----------------------|------------------|------------------------------------|------------------|-----------------------------------|------------------|--------------------------------------|------------------------------|
| Phospho-Residue      | Confidence Level | Phospho-Residue                    | Confidence Level | Phospho-Residue                   | Confidence Level | Phospho-Residue                      | Confidence Level             |
| S33                  | 99               | T10                                | 96               | S33                               | 99               | T100<br>Y103<br>S114<br>T121<br>T129 | 99<br>99<br>99<br>65.7<br>99 |
| Y75                  | 99               | S33                                | 99               |                                   |                  |                                      |                              |
| Y76                  | 99               | Y75                                | 99               |                                   |                  |                                      |                              |
| S91                  | 99               | Y76                                | 99               |                                   |                  |                                      |                              |
| T100                 | 99               | T100                               | 99               |                                   |                  |                                      |                              |
| Y103                 | 99               | Y103                               | 99               |                                   |                  |                                      |                              |
| S114                 | 99               | S114                               | 99               |                                   |                  |                                      |                              |
| T129                 | 20-40            | T129                               | 99               | T166                              | 96               | Y232<br>T236                         | 71.3<br>71.3                 |
| T166                 | 99               |                                    |                  |                                   |                  |                                      |                              |
| T185                 | 79.6             | T185                               | 93               | S219                              | 99               | S280<br>S282<br>Y299                 | 94.9<br>99<br>78.1           |
|                      |                  | T199                               | 99               |                                   |                  |                                      |                              |
| S209                 | 96.6             | S209                               | 99               |                                   |                  |                                      |                              |
| T211                 | 96.5             | T211                               | 99               |                                   |                  |                                      |                              |
|                      |                  |                                    |                  |                                   |                  |                                      |                              |
|                      |                  | T244                               | 99               |                                   |                  |                                      |                              |
| S280                 | 99               | S280                               | 99               |                                   |                  |                                      |                              |
| S282                 | 99               | S282                               | 99               | S327<br>S328<br>T355              | 99<br>99<br>99   | S396<br>S398                         | 99<br>98                     |
| Y299                 | 99               | Y299                               | 99               |                                   |                  |                                      |                              |
| S300                 | 44               | S300                               | 99               |                                   |                  |                                      |                              |
| S327                 | 99               | S327                               | 99               | S396<br>S398                      | 99<br>98         | S440<br>S446                         | 99<br>99                     |
| S328                 | 99               | S328                               | 99               |                                   |                  |                                      |                              |
|                      |                  |                                    |                  |                                   |                  |                                      |                              |
| S366                 | 99               | S366                               | 99               | S396<br>S398                      | 99<br>98         | S440<br>S446                         | 99<br>99                     |
| S392                 | 16               | S392                               | 72-98            |                                   |                  |                                      |                              |
| S393                 | 16               | S393                               | 72-93            |                                   |                  |                                      |                              |
| S394                 | 16               | S394                               | 66-95            | S396<br>S398                      | 99<br>98         | S440<br>S446                         | 99<br>99                     |
| S396                 | 16               | S396                               | 66-95            |                                   |                  |                                      |                              |
| S398                 | 82.5             | S398                               | 72-95            |                                   |                  |                                      |                              |
| S417                 | 99               |                                    |                  | S440<br>S446                      | 99<br>99         | S440<br>S446                         | 99<br>99                     |
| S419                 | 99               | S419                               | 71               |                                   |                  |                                      |                              |
|                      |                  |                                    |                  |                                   |                  |                                      |                              |
| S446                 | 99               |                                    |                  | S440                              | 99               |                                      |                              |
|                      |                  |                                    |                  | S446                              | 99               |                                      |                              |

**Blue:** Not fully conserved

**yellow:** Present in both Flag\_Bcl3 from HEK 293T cells and IKK in vitro kinase assay; but absent in IKK inhibitor in 293T cells
